# Supplementary material for: Outcome of surgical repair of adult digital nerve injury: a systematic review
Source: PubMed Central journal article supplement — BMJ Open. 2019 Mar 13;9(3):e025443. doi: 10.1136/bmjopen-2018-025443 (PMC6429897; doi:10.1136/bmjopen-2018-025443), 2019-03-13
Supplement: bmjopen-2018-025443supp002.pdf [file bmjopen-2018-025443supp002.pdf]

Appendix 2. NIH Quality Assessment Tool for Case Series Studies

|                                                                                                                           | Bunnell, S. 1927 | Shaffer, J. 1950                        | Nemithi, C. 1956                                                              | Buncke, H. 1972                                      | Holst, H. 1975                          |
|---------------------------------------------------------------------------------------------------------------------------|------------------|-----------------------------------------|-------------------------------------------------------------------------------|------------------------------------------------------|-----------------------------------------|
| 1. Was the study question or objective clearly stated?                                                                    | N                | Y                                       | N                                                                             | N                                                    | Y                                       |
| 2. Was the study population clearly and fully described, including a case definition?                                     | Y                | Y                                       | Y                                                                             | N                                                    | Y                                       |
| 3. Were the cases consecutive?                                                                                            | Y                | Y                                       | Y                                                                             | N                                                    | Y                                       |
| 4. Were the subjects comparable?                                                                                          | Y                | N (included non digital nerve injuries) | Y                                                                             | N                                                    | N (included non digital nerve injuries) |
| 5. Was the intervention clearly described?                                                                                | Y                | Y                                       | Y                                                                             | Y                                                    | Y                                       |
| 6. Were the outcome measures clearly defined, valid, reliable and implemented consistently across all study participants? | Unclear          | Y                                       | N                                                                             | Y                                                    | Y                                       |
| 7. Was the length of follow-up adequate?                                                                                  | Y                | Y                                       | Y                                                                             | N                                                    | Y                                       |
| 8. Were the statistical methods well described?                                                                           | N/A              | N/A                                     | N                                                                             | N/A                                                  | N/A                                     |
| 9. Were the results well described?                                                                                       | N                | Y                                       | N                                                                             | N                                                    | N                                       |
| Quality rating (Good, Fair, Poor)                                                                                         | Fair             | Fair                                    | Poor (due to lack of detail in results themselves and how they were obtained) | Poor (this is a symposium with some patient results) | Fair                                    |

|                                                                                                                           | Poppen, N. 1979                                                      | Young, L. 1981                     | Khuc, T. 1982                                                                                     | Sullivan, D. 1985 | Mailander, P. 1988                                                                                    |
|---------------------------------------------------------------------------------------------------------------------------|----------------------------------------------------------------------|------------------------------------|---------------------------------------------------------------------------------------------------|-------------------|-------------------------------------------------------------------------------------------------------|
| 1. Was the study question or objective clearly stated?                                                                    | N                                                                    | Y                                  | N                                                                                                 | Y                 | Y                                                                                                     |
| 2. Was the study population clearly and fully described, including a case definition?                                     | Y                                                                    | Y                                  | N                                                                                                 | Y                 | Y                                                                                                     |
| 3. Were the cases consecutive?                                                                                            | N                                                                    | Y                                  | N                                                                                                 | N                 | Y                                                                                                     |
| 4. Were the subjects comparable?                                                                                          | Y                                                                    | Y                                  | Y                                                                                                 | Y                 | N (included non digital nerve repairs)                                                                |
| 5. Was the intervention clearly described?                                                                                | Y                                                                    | Y                                  | Y                                                                                                 | Y                 | Y                                                                                                     |
| 6. Were the outcome measures clearly defined, valid, reliable and implemented consistently across all study participants? | Y                                                                    | Y                                  | Y                                                                                                 | Y                 | Y                                                                                                     |
| 7. Was the length of follow-up adequate?                                                                                  | Y                                                                    | N                                  | N                                                                                                 | Y                 | Y                                                                                                     |
| 8. Were the statistical methods well described?                                                                           | N/A                                                                  | N/A                                | N/A                                                                                               | N/A               | N/A                                                                                                   |
| 9. Were the results well described?                                                                                       | Y                                                                    | Y                                  | N                                                                                                 | Y                 | Y                                                                                                     |
| Quality rating (Good, Fair, Poor)                                                                                         | Fair (good results set, non consecutive patients and weak objective) | Fair (inadequate follow up period) | Poor (retrospective, non-consecutive series with no clear objective and poorly presented results) | Good              | Good (even though non digital nerves were included, there was a results breakdown for digital nerves) |

|                                                                                                                           | Altissimi, M. 1991 | Pereira, J. 1991                          | Goldie, B. 1992                                                      | Chaise, F. 1993 | Chow, S. 1993 |
|---------------------------------------------------------------------------------------------------------------------------|--------------------|-------------------------------------------|----------------------------------------------------------------------|-----------------|---------------|
| 1. Was the study question or objective clearly stated?                                                                    | Y                  | Y                                         | N                                                                    | N               | Y             |
| 2. Was the study population clearly and fully described, including a case definition?                                     | Y                  | Y                                         | Y                                                                    | Y               | Y             |
| 3. Were the cases consecutive?                                                                                            | Y                  | N                                         | N                                                                    | Y               | Y             |
| 4. Were the subjects comparable?                                                                                          | Y                  | Y                                         | Y                                                                    | Y               | Y             |
| 5. Was the intervention clearly described?                                                                                | Y                  | Y                                         | Y                                                                    | Y               | Y             |
| 6. Were the outcome measures clearly defined, valid, reliable and implemented consistently across all study participants? | Y                  | Y                                         | Y                                                                    | Y               | Y             |
| 7. Was the length of follow-up adequate?                                                                                  | Y                  | Y                                         | Y                                                                    | Y               | Y             |
| 8. Were the statistical methods well described?                                                                           | N/A                | N/A                                       | N/A                                                                  | N/A             | N/A           |
| 9. Were the results well described?                                                                                       | Y                  | Y                                         | Y                                                                    | Y               | Y             |
| Quality rating (Good, Fair, Poor)                                                                                         | Good               | Fair (small sample size, non consecutive) | Fair (good results set, non consecutive patients and weak objective) | Good            | Good          |

|                                                                                                                           | Kallio, P. 1993                                                  | Al-Ghazal, S. 1994                                 | Elias, B. 1994                                                   | Vertruyen, M. 1994                                               | Efstathopoulos, D. 1995                                                                         |
|---------------------------------------------------------------------------------------------------------------------------|------------------------------------------------------------------|----------------------------------------------------|------------------------------------------------------------------|------------------------------------------------------------------|-------------------------------------------------------------------------------------------------|
| 1. Was the study question or objective clearly stated?                                                                    | N                                                                | N                                                  | N                                                                | N                                                                | N                                                                                               |
| 2. Was the study population clearly and fully described, including a case definition?                                     | N                                                                | Y                                                  | N                                                                | N                                                                | N                                                                                               |
| 3. Were the cases consecutive?                                                                                            | Y                                                                | Y                                                  | N                                                                | N                                                                | Y                                                                                               |
| 4. Were the subjects comparable?                                                                                          | N                                                                | Y                                                  | Y                                                                | Y                                                                | Y                                                                                               |
| 5. Was the intervention clearly described?                                                                                | Y                                                                | Y                                                  | Y                                                                | Y                                                                | Y                                                                                               |
| 6. Were the outcome measures clearly defined, valid, reliable and implemented consistently across all study participants? | Y                                                                | Y                                                  | Y                                                                | Y                                                                | N                                                                                               |
| 7. Was the length of follow-up adequate?                                                                                  | Y                                                                | N                                                  | Y                                                                | Y                                                                | Unclear                                                                                         |
| 8. Were the statistical methods well described?                                                                           | N/A                                                              | N/A                                                | N/A                                                              | N/A                                                              | N/A                                                                                             |
| 9. Were the results well described?                                                                                       | Y                                                                | Y                                                  | Y                                                                | Y                                                                | Y                                                                                               |
| Quality rating (Good, Fair, Poor)                                                                                         | Fair (weak objective, non-comparable cases but good results set) | Fair (needed longer follow up, some only 8 months) | Poor (due to non consecutive nature of cases and weak objective) | Fair (due to non consecutive nature of cases and weak objective) | Fair (due to weak objective, also some notes-based follow up, unclear when assessment was made) |

|                                                                                                                           | Tadjalli, H. 1995                                                              | Wang, W. 1996                                                               | Segalman, K. 2001        | Cheng, A. 2001                                       | Portincasa, A. 2007                                              |
|---------------------------------------------------------------------------------------------------------------------------|--------------------------------------------------------------------------------|-----------------------------------------------------------------------------|--------------------------|------------------------------------------------------|------------------------------------------------------------------|
| 1. Was the study question or objective clearly stated?                                                                    | Y                                                                              | Y                                                                           | Y                        | Y                                                    | N                                                                |
| 2. Was the study population clearly and fully described, including a case definition?                                     | Y                                                                              | Y                                                                           | Y                        | Y                                                    | Y                                                                |
| 3. Were the cases consecutive?                                                                                            | N                                                                              | N                                                                           | N                        | Y                                                    | Y                                                                |
| 4. Were the subjects comparable?                                                                                          | N (included replants)                                                          | Y                                                                           | Y                        | Y                                                    | N (included non digital nerves and variety of injury mechanisms) |
| 5. Was the intervention clearly described?                                                                                | Y                                                                              | Y                                                                           | Y                        | Y                                                    | Y                                                                |
| 6. Were the outcome measures clearly defined, valid, reliable and implemented consistently across all study participants? | Y                                                                              | Y                                                                           | N                        | Y                                                    | N                                                                |
| 7. Was the length of follow-up adequate?                                                                                  | Y                                                                              | Y                                                                           | Y                        | N                                                    | Y                                                                |
| 8. Were the statistical methods well described?                                                                           | Y                                                                              | Y                                                                           | N/A                      | Y                                                    | N/A                                                              |
| 9. Were the results well described?                                                                                       | Y                                                                              | Y                                                                           | Y                        | Y                                                    | N                                                                |
| Quality rating (Good, Fair, Poor)                                                                                         | Fair (included replants and retrospective, 26/150 potential patients included) | Fair (patients without follow up excluded but not stated how many this was) | Fair (high dropout rate) | Good (even though follow up was limited to 6 months) | Poor (due to diverse study group and lack of detail in results)  |

|                                                                                                                           | Hohendorff, B. 2009                                         | Lohmeyer, J . 2009                  | Thomas, P. 2015                                                              | Fakin, M. 2016 | Huber, J. 2017 |
|---------------------------------------------------------------------------------------------------------------------------|-------------------------------------------------------------|-------------------------------------|------------------------------------------------------------------------------|----------------|----------------|
| 1. Was the study question or objective clearly stated?                                                                    | Y                                                           | Y                                   | Y                                                                            | Y              | Y              |
| 2. Was the study population clearly and fully described, including a case definition?                                     | Y                                                           | Y                                   | Y                                                                            | Y              | Y              |
| 3. Were the cases consecutive?                                                                                            | Y                                                           | Y                                   | N                                                                            | Y              | Y              |
| 4. Were the subjects comparable?                                                                                          | Y                                                           | Y                                   | Y                                                                            | Y              | Y              |
| 5. Was the intervention clearly described?                                                                                | Y                                                           | Y                                   | Y                                                                            | Y              | Y              |
| 6. Were the outcome measures clearly defined, valid, reliable and implemented consistently across all study participants? | N                                                           | N (huge drop out rate)              | Y                                                                            | Y              | Y              |
| 7. Was the length of follow-up adequate?                                                                                  | N                                                           | Y                                   | Y                                                                            | Y              | Y              |
| 8. Were the statistical methods well described?                                                                           | N/A                                                         | Y                                   | Y                                                                            | Y              | Y              |
| 9. Were the results well described?                                                                                       | N                                                           | Y                                   | Y                                                                            | Y              | Y              |
| Quality rating (Good, Fair, Poor)                                                                                         | Poor (drop out rate, short follow up, results presentation) | Fair (concerns about drop out rate) | Good (though would have been stronger with more patients, consecutive cases) | Good           | Good           |
